# Supplementary material
Source: MDPI journal article supplement (https://www.mdpi.com/2075-5309/12/3/335)
Supplement: s1 [file s1]

Table S1. Details of studies included in the review.

| Study title<br>Author(s) and year of publication/<br>author(s) disciplinary background<br>Article/report type                                                                                                                                          | Country (origin/focus) | Purpose                                                                                                                                   | Description of sample                                                                                                                | Study Design                   | Main findings                                                                                                                                                                                                                                                                                                                                             |
|--------------------------------------------------------------------------------------------------------------------------------------------------------------------------------------------------------------------------------------------------------|------------------------|-------------------------------------------------------------------------------------------------------------------------------------------|--------------------------------------------------------------------------------------------------------------------------------------|--------------------------------|-----------------------------------------------------------------------------------------------------------------------------------------------------------------------------------------------------------------------------------------------------------------------------------------------------------------------------------------------------------|
| Health and wellbeing of Nepalese migrant workers abroad<br><br>Adhikary et al. 2018/ Health Sciences<br><br>Journal article                                                                                                                            | UK/Nepal               | Assessment of the health and mental wellbeing of Nepalese construction workers                                                            | Male migrant Nepalese construction workers in Malaysia, Qatar, and Saudi Arabia<br><br>N=403<br><br>Age: range (20-58 years)/ 85.1%* | Quantitative (cross-sectional) | Key PRFs: <ul style="list-style-type: none"><li>• Age</li><li>• Poor work environment</li><li>• Perceived health risks</li></ul>                                                                                                                                                                                                                          |
| Prevalence of work-related musculoskeletal pain in masonry apprentices<br><br>Anton et al. 2020/ Health Sciences<br><br>Journal Article                                                                                                                | USA                    | Evaluate the prevalence of musculoskeletal symptoms (MSS), time loss, and healthcare use among construction apprentices                   | First to fourth-year brick and block masonry apprentices<br><br>N=183<br><br>Age: mean 29.07 (SD=7.2)                                | Quantitative (cross-sectional) | MSS is a key PRF significantly associated with poorer mental health, especially among those who were prevented from going to work                                                                                                                                                                                                                         |
| Report on the Construction Industry Apprentices’ Focus Groups<br><br>AISRAP 2018/ Health Sciences<br><br>Industry/organizational report                                                                                                                | Australia              | Identify problems experienced by young people both in and outside of work, and the types of support required to help them during distress | Young construction industry apprentices<br><br>N=57<br><br>Age: Not provided but discusses the case of young people                  | Qualitative (cross-sectional)  | Key PRFs: <ul style="list-style-type: none"><li>• Workplace culture that tolerates bullying and substance abuse</li><li>• Poor relationship with superiors and others at the workplace</li><li>• Poor employer support at work</li><li>• Low compensation</li><li>• Inadequate knowledge of mental health symptoms</li></ul>                              |
| Suicide in Queensland's Commercial Building and Construction Industry: An investigation of factors associated with suicide and recommendations for the prevention of suicide<br><br>AISRAP 2006/ Health Sciences<br><br>Industry/organizational report | Australia              | Understand the individual, industry, and work-home interface factors relevant in construction industry suicides                           | General construction workers<br><br>N=22<br><br>Age: range (20-55 years)/ 36.3%                                                      | Qualitative (longitudinal)     | Key PRFs: <ul style="list-style-type: none"><li>• Age</li><li>• Family relationship problems (divorce, separation)</li><li>• Prior psychiatric illness</li><li>• Industry culture that promotes substance abuse (alcohol and illicit drugs)</li><li>• Long working hours</li><li>• Lack of job security</li><li>• Financial management problems</li></ul> |

|                                                                                                                                                                              |              |                                                                                                                                                                                                                           |                                                                                                                     |                                |                                                                                                                                                                                                                                                                                                                                                                   |
|------------------------------------------------------------------------------------------------------------------------------------------------------------------------------|--------------|---------------------------------------------------------------------------------------------------------------------------------------------------------------------------------------------------------------------------|---------------------------------------------------------------------------------------------------------------------|--------------------------------|-------------------------------------------------------------------------------------------------------------------------------------------------------------------------------------------------------------------------------------------------------------------------------------------------------------------------------------------------------------------|
| Structural Equation Modeling of Occupational Stress in the Construction Industry                                                                                             | South Africa | Assessment of stress and its impacts on the health of construction industry workers                                                                                                                                       | Construction professionals (architects, civil engineers, quantity surveyors, and project and construction managers) | Quantitative (cross-sectional) | Key PRFs: <ul style="list-style-type: none"> <li>• Age</li> <li>• Perceptions of job demands</li> <li>• Job control factors</li> <li>• Perceptions of organizational climate</li> <li>• Workplace discrimination</li> </ul>                                                                                                                                       |
| Bowen et al. 2014/Built Environment and Social Sciences                                                                                                                      |              |                                                                                                                                                                                                                           | N=676<br>Age: range (25-50 years approximately)                                                                     |                                |                                                                                                                                                                                                                                                                                                                                                                   |
| Journal article                                                                                                                                                              |              |                                                                                                                                                                                                                           |                                                                                                                     |                                |                                                                                                                                                                                                                                                                                                                                                                   |
| Psychological distress in remote mining and construction workers in Australia                                                                                                | Australia    | Assessment of the prevalence and correlates of psychological distress among remote mining and construction workers                                                                                                        | Remote mining and construction workers, mostly FIFO                                                                 | Quantitative (cross-sectional) | Psychological distress significantly higher in workers aged 25-34 years.                                                                                                                                                                                                                                                                                          |
| Bowers et al. 2018/ Health Sciences                                                                                                                                          |              |                                                                                                                                                                                                                           | N=1124<br><br>Age: mean 37.30 (SD=10.7); range (24-71 years)/ 48%                                                   |                                | Key PRFs: <ul style="list-style-type: none"> <li>• Stigmatization</li> <li>• Relationship problems</li> <li>• Financial stress</li> <li>• Compressed roster swings</li> <li>• Social isolation</li> </ul>                                                                                                                                                         |
| Journal article                                                                                                                                                              |              |                                                                                                                                                                                                                           |                                                                                                                     |                                |                                                                                                                                                                                                                                                                                                                                                                   |
| Working at heights: patterns and predictors of illicit drug use in construction workers                                                                                      | Australia    | Assessment of the prevalence rates and predictors of Australian construction workers' use of drugs (cannabis, cocaine and meth/amphetamine), general and mental health, job stress and workplace cultural norms for drugs | Male construction workers in Australia who had undertaken drug and alcohol impairment training                      | Quantitative (cross-sectional) | Significant risk factors of drug use include: <ul style="list-style-type: none"> <li>• Higher alcohol consumption (all drug types)</li> <li>• Younger age and poorer general health (cannabis and cocaine)</li> <li>• Higher psychological distress (cannabis)</li> <li>• Workplace availability</li> <li>• Descriptive and injunctive norms (cocaine)</li> </ul> |
| Chapman et al.2020/ Health Sciences                                                                                                                                          |              |                                                                                                                                                                                                                           | N=511<br><br>Age: mean 35.10 (SD=11.76); range (15-68 years)                                                        |                                |                                                                                                                                                                                                                                                                                                                                                                   |
| Journal article                                                                                                                                                              |              |                                                                                                                                                                                                                           |                                                                                                                     |                                |                                                                                                                                                                                                                                                                                                                                                                   |
| Impact of individual resilience and safety climate on safety performance and psychological stress of construction workers: A case study of the Ontario construction industry | Canada       | Examination of the role of safety climate and individual resilience in safety performance and job stress in the Canadian construction industry                                                                            | Male construction workers employed in different sizes of firms (micro to large scale)                               | Quantitative (cross-sectional) | Organizational and individual factors interact to affecting individual psychological well-being                                                                                                                                                                                                                                                                   |
| Chen et al. 2017/Built Environment                                                                                                                                           |              |                                                                                                                                                                                                                           | N=837<br><br>Age: mean 37.11 (SD=12); range (16-67 years)/ 69%                                                      |                                | Strong correlation between job stress and physical safety outcomes                                                                                                                                                                                                                                                                                                |
| Journal article                                                                                                                                                              |              |                                                                                                                                                                                                                           |                                                                                                                     |                                | Key PRF: <ul style="list-style-type: none"> <li>• Poor safety climate</li> </ul>                                                                                                                                                                                                                                                                                  |
| Study on Mental Health Status and Life Quality of Migrant Workers in Construction Industry                                                                                   | China        | Examination of the quality of life of migrant workers                                                                                                                                                                     | Migrant workers in China's construction industry                                                                    | Quantitative (cross-sectional) | Key PRFs: <ul style="list-style-type: none"> <li>• Frustration, adversity, and setbacks</li> <li>• Job satisfaction</li> <li>• Family support</li> <li>• Present illness Discrimination</li> <li>• Lack of sleep/ poor sleeping habits</li> </ul>                                                                                                                 |
| Dong 2018/ Built Environment                                                                                                                                                 |              |                                                                                                                                                                                                                           | N=867<br><br>Age: mean 36.4 (SD=10.2); range (31-45 years)/35.9%                                                    |                                |                                                                                                                                                                                                                                                                                                                                                                   |
| Journal article                                                                                                                                                              |              |                                                                                                                                                                                                                           |                                                                                                                     |                                |                                                                                                                                                                                                                                                                                                                                                                   |

|                                                                                                                                       |                      |                                                                                                                                                                                                     |                                                                                                   |                                 |                                                                                                                                                                                                                                                                                                                                   |
|---------------------------------------------------------------------------------------------------------------------------------------|----------------------|-----------------------------------------------------------------------------------------------------------------------------------------------------------------------------------------------------|---------------------------------------------------------------------------------------------------|---------------------------------|-----------------------------------------------------------------------------------------------------------------------------------------------------------------------------------------------------------------------------------------------------------------------------------------------------------------------------------|
| Long-Term Health Outcomes of Work-Related Injuries Among Construction Workers—Findings from the National Longitudinal Survey of Youth | USA                  | Examination of the relationship between work-related injuries and health outcomes among a (measurement of respondents’ overall health as they turned 40 years old)                                  | Young male blue-collar construction workers who had sustained workplace injuries<br><br>N=1435    | Quantitative (longitudinal)     | Workers with DAFW injuries were more likely to report mental health issues and emotional problems<br><br>At age 40, an average of 10 years after injury, those with DAFW injury had worse self-reported general and mental health                                                                                                 |
| Dong et al. 2015/ Built Environment                                                                                                   |                      |                                                                                                                                                                                                     | Age: range (14-22 years at the time of initial survey)                                            |                                 |                                                                                                                                                                                                                                                                                                                                   |
| Journal article                                                                                                                       |                      |                                                                                                                                                                                                     |                                                                                                   |                                 |                                                                                                                                                                                                                                                                                                                                   |
| A review of the evidence related to the impacts of and interventions for workplace bullying in the Construction Industry              | Australia/<br>Global | Examination of the impact of bullying on workplace physical and mental health and safety in the construction industry interventions against bullying                                                | Published bullying literature on young construction workers in general<br><br>N= Not provided     | Systematic review               | Bullying is a key PRF and has a high level of prevalence.<br><br>Rates:<br><ul style="list-style-type: none"><li>• Global (15%)</li><li>• Australia (10% average, with FIFO workers being 56%)</li></ul>                                                                                                                          |
| Doran et al. 2020/ Health Sciences                                                                                                    |                      |                                                                                                                                                                                                     | Age: Not provided but discusses the case of young people                                          |                                 |                                                                                                                                                                                                                                                                                                                                   |
| Industry/organizational report                                                                                                        |                      |                                                                                                                                                                                                     |                                                                                                   |                                 |                                                                                                                                                                                                                                                                                                                                   |
| Alcohol and substance misuse in the construction industry                                                                             | UK                   | Investigation of the factors contributing to the menace of alcohol and substance misuse (ASM) in the construction industry, and its mitigation                                                      | General construction workers and professionals<br><br>N=18 (Qual)/ 142 (Quant)                    | Mixed methods (cross-sectional) | On-site workers use alcohol to improve their daily routines or numb the physical pain<br><br>Key PRFs:<br><ul style="list-style-type: none"><li>• Mental strain</li><li>• Site working conditions</li><li>• Male dominance</li><li>• Ineffective human resource management</li><li>• Transient work</li></ul>                     |
| Flannery et al. 2019/ Built Environment                                                                                               |                      |                                                                                                                                                                                                     | Age: Not provided but discusses the case of young people                                          |                                 |                                                                                                                                                                                                                                                                                                                                   |
| Journal article                                                                                                                       |                      |                                                                                                                                                                                                     |                                                                                                   |                                 |                                                                                                                                                                                                                                                                                                                                   |
| FIFI/DIDO Mental Health Research Report 2013                                                                                          | Australia            | Identification of the stressors associated with FIFO work and the ways in which FIFO workers cope with these stressors. Identifications of services which would best meet the needs of FIFO workers | FIFO/DIDO construction workers<br><br>N=18 (Qual)/ 924 (Quant)                                    | Mixed methods (cross-sectional) | Key PRFs:<br><ul style="list-style-type: none"><li>• Minimal knowledge of the realities of FIFO work before starting work</li><li>• Family/home separation</li><li>• Adjusting to long day/night shifts</li><li>• Disrupted sleep leading to fatigue</li><li>• Accommodation problems</li><li>• On-site work conditions</li></ul> |
| Henry et al. 2013/ Social Sciences                                                                                                    |                      |                                                                                                                                                                                                     | Age: Not provided but discusses the case of young people (about 80% of sample less than 49 years) |                                 |                                                                                                                                                                                                                                                                                                                                   |
| Industry/organizational report                                                                                                        |                      |                                                                                                                                                                                                     |                                                                                                   |                                 |                                                                                                                                                                                                                                                                                                                                   |
| Posttraumatic Stress Disorder in Co-workers following Exposure to a Fatal Construction Accident in China                              | China                | Assessment of stress-induced PTSD and associated depression induced by accidents among construction workers                                                                                         | On-site male construction workers<br><br>N1=41 / N2 = 47                                          | Quantitative (cross-sectional)  | Fatal construction accidents is a significant stressor (this is strongly associate with PTSD and depressive symptoms)                                                                                                                                                                                                             |
| Hu et al. 2000/ Health Sciences                                                                                                       |                      |                                                                                                                                                                                                     | Age: range (18-35 years) (mean N1 = 25.36 years SD [4.72]; mean N2 = 24.46 years SD [3.59])       |                                 | Fundamental (i.e., depression, anxiety, fearfulness, irritability, panic attacks, psychic numbness, apathy) and specific (i.e., reexperiencing, avoidance, and hyperarousal) symptoms                                                                                                                                             |
| Journal article                                                                                                                       |                      |                                                                                                                                                                                                     |                                                                                                   |                                 |                                                                                                                                                                                                                                                                                                                                   |

|                                                                                                                   |           |                                                                                                                                                                                                                                                                       |                                                                                                                                                                      |                                                                              |                                                                                                                                                                                                                                                                                                                                                                                                                |
|-------------------------------------------------------------------------------------------------------------------|-----------|-----------------------------------------------------------------------------------------------------------------------------------------------------------------------------------------------------------------------------------------------------------------------|----------------------------------------------------------------------------------------------------------------------------------------------------------------------|------------------------------------------------------------------------------|----------------------------------------------------------------------------------------------------------------------------------------------------------------------------------------------------------------------------------------------------------------------------------------------------------------------------------------------------------------------------------------------------------------|
| Workers' Age and the Impact of Psychological Factors on the Perception of Safety at Construction Sites            | Pakistan  | Comparison of the effect of psychological factors for different ages of workers regarding their perception of safety in the construction industry                                                                                                                     | General construction workers<br><br>N= 265 (145 for Group 1 and 120 for Group 2)<br><br>Age: range (18-35 years for Group 1 [54.70%] and above 35 years for Group 2) | Quantitative (cross-sectional)                                               | Workload and job satisfaction are significantly dominant factors on workers' perception of safety in older workers<br><br>Organizational relationships, mental stress, and job security are dominant factors for younger workers at construction sites                                                                                                                                                         |
| Idrees et al./2017/Built environment (Engineering)                                                                |           |                                                                                                                                                                                                                                                                       |                                                                                                                                                                      |                                                                              |                                                                                                                                                                                                                                                                                                                                                                                                                |
| Journal Article                                                                                                   |           |                                                                                                                                                                                                                                                                       |                                                                                                                                                                      |                                                                              |                                                                                                                                                                                                                                                                                                                                                                                                                |
| Are Young Men Getting the Message? Age Differences in Suicide Prevention Literacy among Male Construction Workers | Australia | Examination of age differences in help-seeking (beliefs related to suicide prevention literacy and attitudes to the workplace in addressing mental health) among male construction workers; and age differences in response to a workplace suicide prevention program | Young male construction workers<br><br>N=19917<br><br>Age: range (15-35 years) 46.50%. More than half aged 25-44 years                                               | Quantitative (cross-sectional)                                               | Young male construction workers demonstrated poorer baseline suicide prevention literacy<br><br>Young men employed in manual occupations had poorer suicide prevention literacy than older men, and young men employed in professional/managerial roles                                                                                                                                                        |
| King et al. 2019/ Health Sciences                                                                                 |           |                                                                                                                                                                                                                                                                       |                                                                                                                                                                      |                                                                              |                                                                                                                                                                                                                                                                                                                                                                                                                |
| Journal Article                                                                                                   |           |                                                                                                                                                                                                                                                                       |                                                                                                                                                                      |                                                                              |                                                                                                                                                                                                                                                                                                                                                                                                                |
| Impacts of Stressors and Stress on the Injury Incidents of Construction Workers in Hong Kong                      | Hong Kong | Identification of the different stressors affecting two types of stress of construction workers (i.e., job stress and emotional stress), and to explore the impacts of the two types of stress on construction workers' injury incidents in Hong Kong                 | General construction workers<br><br>N=142<br><br>Age: range (under 20-40 years) 53.20%                                                                               | Quantitative (cross-sectional)<br><br>Conceptual framework                   | Key PRFs: <ul style="list-style-type: none"> <li>• Work overload</li> <li>• Role ambiguity</li> <li>• Lack of autonomy</li> <li>• Unfair reward and treatment</li> <li>• Inappropriate safety equipment</li> <li>• Low optimism</li> <li>• Interrole conflict</li> <li>• Poor workgroup relationship</li> <li>• Lack of feedback</li> <li>• Poor physical environment</li> <li>• Unsafe environment</li> </ul> |
| Leung et al./2010/Built Environment                                                                               |           |                                                                                                                                                                                                                                                                       |                                                                                                                                                                      |                                                                              |                                                                                                                                                                                                                                                                                                                                                                                                                |
| Journal Article                                                                                                   |           |                                                                                                                                                                                                                                                                       |                                                                                                                                                                      |                                                                              |                                                                                                                                                                                                                                                                                                                                                                                                                |
| Improving the health of male, blue collar construction workers: a social ecological perspective                   | Australia | Understanding workers' health, the impact of health promotion measures, and participants' experiences of a health promotion planning model                                                                                                                            | Blue collar construction workers<br><br>N=90<br><br>Age: below 39 years (52.2%); below 30 years (32.2%)                                                              | Mixed methods (cross-sectional)<br><br>Theoretical framework: Social Ecology | Long working hours is a major PRF. This leads to limited time outside work, which is a significant barrier to engaging in healthy behaviour<br><br>Social factors (e.g., ridicule) prevent workers from utilizing on-site support                                                                                                                                                                              |
| Lingard and Turner 2015/ Built Environment                                                                        |           |                                                                                                                                                                                                                                                                       |                                                                                                                                                                      |                                                                              |                                                                                                                                                                                                                                                                                                                                                                                                                |
| Journal Article                                                                                                   |           |                                                                                                                                                                                                                                                                       |                                                                                                                                                                      |                                                                              |                                                                                                                                                                                                                                                                                                                                                                                                                |

|                                                                                                                                  |                                     |                                                                                                                                                                                          |                                                                                                                                               |                                                                                                                                                   |                                                                                                                                                                                                                                                                                                                                                                                                                                                                |
|----------------------------------------------------------------------------------------------------------------------------------|-------------------------------------|------------------------------------------------------------------------------------------------------------------------------------------------------------------------------------------|-----------------------------------------------------------------------------------------------------------------------------------------------|---------------------------------------------------------------------------------------------------------------------------------------------------|----------------------------------------------------------------------------------------------------------------------------------------------------------------------------------------------------------------------------------------------------------------------------------------------------------------------------------------------------------------------------------------------------------------------------------------------------------------|
| Extrinsic psychosocial stressors and workers' productivity: impact of employee age and industry experience                       | Pakistan and Hong Kong/<br>Pakistan | Exploring the impact of employee age and industrial experience on extrinsic psychosocial stressors that may influence the productivity of workers (young workers compared with old ones) | Workers of different ages in the Pakistani construction industry<br><br>N=163<br><br>Age: Not provided but discusses the case of young people | Quantitative (cross-sectional)<br><br>Conceptual framework and integrated theory (Social support theory; Coping theory; and Self-Efficacy theory) | Key PRFs: <ul style="list-style-type: none"> <li>• High temperature</li> <li>• Workspace atmosphere</li> <li>• Discontinuity in work schedule</li> <li>• Sudden illness of worker</li> <li>• Abrupt schedule compression</li> <li>• Delay in salaries</li> <li>• Economic situation in country</li> <li>• Financial instability</li> <li>• Wars and natural disasters</li> </ul>                                                                               |
| Maqsoom et al. 2020/ Built Environment<br><br>Journal Article                                                                    |                                     |                                                                                                                                                                                          |                                                                                                                                               |                                                                                                                                                   |                                                                                                                                                                                                                                                                                                                                                                                                                                                                |
| Young workers and mental health: A systematic review of the effect of employment and transition into employment on mental health | Australia                           | Review of current research on the effects of employment on the mental health of young people                                                                                             | Literature on general youth population below 30 years<br><br>N=47<br><br>Age: Not provided but discusses the case of young people exclusively | Systematic review (PRISMA)                                                                                                                        | Key PRFs: <ul style="list-style-type: none"> <li>• Low job control</li> <li>• Higher psychological demands from work tasks</li> <li>• Harassment</li> <li>• Job insecurity (i.e., unemployment and/or the threat of unemployment)</li> </ul>                                                                                                                                                                                                                   |
| Milner et al. 2019/ Health Sciences<br><br>Industry/organizational report                                                        |                                     |                                                                                                                                                                                          |                                                                                                                                               |                                                                                                                                                   |                                                                                                                                                                                                                                                                                                                                                                                                                                                                |
| Male suicide among construction workers in Australia: a qualitative analysis of the major stressors precipitating death          | Australia                           | Examination of work and non-work-related influences on suicide                                                                                                                           | Male construction workers<br><br>N=34<br><br>Age: range (15-69 years). Majority of sample under 35 years.                                     | Qualitative (cross-sectional)                                                                                                                     | Work and non-work factors were often interrelated and were significantly linked with pressures that occurred prior to death<br><br>Key PRFs: <ul style="list-style-type: none"> <li>• Mental health issues prior to death</li> <li>• Transient working experiences</li> <li>• Workplace injury</li> <li>• Chronic illness</li> <li>• Low job control</li> <li>• High job demands</li> <li>• Long working hours driven by industry-related timelines</li> </ul> |
| Milner et al. 2017/ Health Sciences<br><br>Journal article                                                                       |                                     |                                                                                                                                                                                          |                                                                                                                                               |                                                                                                                                                   |                                                                                                                                                                                                                                                                                                                                                                                                                                                                |
| Young construction workers: substance use, mental health, and workplace psychosocial factors                                     | Australia                           | Examination of the relationship between alcohol and drug (AOD) use, psychological wellbeing, and the workplace psychosocial environment                                                  | Young construction apprentices<br><br>N=169<br><br>Age: 71.3% under 21 years. Exclusively discusses the case of young people,                 | Quantitative (cross-sectional)                                                                                                                    | Key PRFs: <ul style="list-style-type: none"> <li>• Lack of general and workplace social support</li> <li>• Poor work engagement</li> <li>• Poor communication with supervisors, work colleagues, family, and friends</li> <li>• Job stress</li> <li>• Workplace bullying</li> </ul>                                                                                                                                                                            |
| Pidd et al. 2017/ Health Sciences<br><br>Journal article                                                                         |                                     |                                                                                                                                                                                          |                                                                                                                                               |                                                                                                                                                   |                                                                                                                                                                                                                                                                                                                                                                                                                                                                |

|                                                                                                                   |           |                                                                                                                                                                                               |                                                                                                                       |                                               |                                                                                                                                                                                                                                                                                                                                                                         |
|-------------------------------------------------------------------------------------------------------------------|-----------|-----------------------------------------------------------------------------------------------------------------------------------------------------------------------------------------------|-----------------------------------------------------------------------------------------------------------------------|-----------------------------------------------|-------------------------------------------------------------------------------------------------------------------------------------------------------------------------------------------------------------------------------------------------------------------------------------------------------------------------------------------------------------------------|
| Physical and cognitive demands of work in building construction                                                   | Germany   | Assessment of the physical and cognitive demands experienced by construction workers                                                                                                          | Workers in small German construction firms                                                                            | Mixed methods (cross-sectional)               | The highest levels of cognitive demands were related to reliability, friendliness, assertiveness, and motivation. Lowest levels of cognitive demand were related to originality and auditory attention required to perform tasks.                                                                                                                                       |
| Rodriguez et al. 2020/ Health Sciences                                                                            |           |                                                                                                                                                                                               | N=35 (Qual)/ 30 (Quant)                                                                                               |                                               |                                                                                                                                                                                                                                                                                                                                                                         |
| Journal article                                                                                                   |           |                                                                                                                                                                                               | Age: Qual [range (19-49 years); mean 33.2 years (SD: 9.8)]/ Quant [range (18-60 years); mean 34.79 years (SD: 11.83)] |                                               | Time and effort-related demands were relatively high while performance-related demands were relatively low                                                                                                                                                                                                                                                              |
| Construction workers' alcohol use, knowledge, perceptions of risk and workplace norms                             | Australia | Investigation of the patterns, prevalence, and predictors of risky drinking among construction workers                                                                                        | Male construction workers in Australia                                                                                | Quantitative (cross-sectional)                | Prevalence of alcohol use was higher than the national average, particularly for workers below the age of 25 years.                                                                                                                                                                                                                                                     |
| Roche et al. 2020/ Health Sciences                                                                                |           |                                                                                                                                                                                               | N=511                                                                                                                 |                                               | Key PRFs:                                                                                                                                                                                                                                                                                                                                                               |
| Journal article                                                                                                   |           |                                                                                                                                                                                               | Age: range (15-68 years); mean = 35.1 years; 57.60%                                                                   |                                               | <ul style="list-style-type: none"> <li>• Perception of alcohol-related risks in connection with workplace safety</li> <li>• Poor general health</li> <li>• Low alcohol knowledge</li> <li>• Descriptive norms regarding workmates' support for alcohol use</li> </ul>                                                                                                   |
| The Impact of Workplace Bullying on Mental Health and Suicidality in Queensland Construction Industry Apprentices | Australia | Estimation of the prevalence of bullying among apprentices; exploration of apprentices' mental health and well-being, perceptions of quality supervision, and exposure to suicidal behaviours | Registered construction industry apprentices                                                                          | Quantitative (cross-sectional)                | Key PRFs:                                                                                                                                                                                                                                                                                                                                                               |
| Ross et al. 2020/ Health Sciences                                                                                 |           |                                                                                                                                                                                               | N= 1483                                                                                                               |                                               | <ul style="list-style-type: none"> <li>• Age</li> <li>• Working for a large employer</li> <li>• Unemployment</li> <li>• Alternative lifestyles</li> <li>• Financial insecurity</li> <li>• Bullying and harassment</li> <li>• High levels of exposure to suicidal behaviour</li> <li>• Work pressures</li> <li>• Poor support for education</li> <li>• Stigma</li> </ul> |
| Journal article                                                                                                   |           |                                                                                                                                                                                               | Age: range (14-65 years). Discusses the case of young people exclusively                                              |                                               |                                                                                                                                                                                                                                                                                                                                                                         |
| Psychological challenges confronting graduate construction students in Australia                                  | Australia | Identification of the stressors and assesses the mental health symptoms of graduate students                                                                                                  | Graduate students pursuing construction-related coursework degrees                                                    | Quantitative (cross-sectional)                | Most significant category of PRFs are academic stressors                                                                                                                                                                                                                                                                                                                |
| Sunindijo and Kamardeen 2020/ Built Environment                                                                   |           |                                                                                                                                                                                               | N=107                                                                                                                 | Theoretical framework: U theory; Drive theory | High self-expectations and worrying about under-performing in studies are the most frequent                                                                                                                                                                                                                                                                             |
| Journal article                                                                                                   |           |                                                                                                                                                                                               | Age: range (20- above 60 years); 40.19%-75.70%                                                                        |                                               |                                                                                                                                                                                                                                                                                                                                                                         |

|                                                                                                               |           |                                                                                                                                                                                                              |                                                                                                                   |                                                                              |                                                                                                                                                                                                                                                                                                                                                                                    |
|---------------------------------------------------------------------------------------------------------------|-----------|--------------------------------------------------------------------------------------------------------------------------------------------------------------------------------------------------------------|-------------------------------------------------------------------------------------------------------------------|------------------------------------------------------------------------------|------------------------------------------------------------------------------------------------------------------------------------------------------------------------------------------------------------------------------------------------------------------------------------------------------------------------------------------------------------------------------------|
| Using a stress audit: The construction site manager experience in the UK                                      | UK        | Conducting a stress audit among construction industry site managers as a precursor to a stress management intervention programme                                                                             | Middle-aged construction managers                                                                                 | Mixed methods (cross-sectional)                                              | Key PRFs: <ul style="list-style-type: none"> <li>• Role ambiguity at work</li> <li>• Work overload</li> <li>• Staff shortages</li> <li>• Strains from organization culture and climate</li> <li>• Managerial role insecurity</li> <li>• Working within ‘boundary relationships’ and new technology</li> <li>• Time-pressure overspill into home and leisure environment</li> </ul> |
| Sutherland and Davidson 1993/ Business Management                                                             |           |                                                                                                                                                                                                              | N=36 (Qual)/ 561 (Quant)                                                                                          |                                                                              |                                                                                                                                                                                                                                                                                                                                                                                    |
| Journal article                                                                                               |           |                                                                                                                                                                                                              | Age: range (19-above 60 years); 37% below 36 years                                                                |                                                                              |                                                                                                                                                                                                                                                                                                                                                                                    |
| The social contexts of drinking among Irish men in London                                                     | UK        | Exploration of health beliefs and behaviors that cause alcohol use among middle-aged Irish men and their implications for the issue of alcohol misuse and mental health among younger Irish groups in the UK | Young Irish men undertaking construction work in Britain                                                          | Qualitative (cross-sectional)                                                | Excessive drinking of alcohol is culturally acceptable as part of being Irish in four different dimensions – approved as a facilitator of social engagement; approved sub-culture among Irish construction workers; demonstration of masculinity; used as a coping mechanism by young people dealing with institutional and family abuse                                           |
| Tilki 2006/ Health Sciences and Social Sciences                                                               |           |                                                                                                                                                                                                              | Sample size and age not mentioned; discussion is applied exclusively to the case of young people                  |                                                                              |                                                                                                                                                                                                                                                                                                                                                                                    |
| Journal article                                                                                               |           |                                                                                                                                                                                                              |                                                                                                                   |                                                                              |                                                                                                                                                                                                                                                                                                                                                                                    |
| A qualitative study of factors affecting mental health amongst low-income working mothers in Bangalore, India | India     | Exploration of the relationship between work, caring for family, spousal support, stress relief strategies and mental health amongst working mothers                                                         | Low-income working mothers working in construction and residing in urban slums                                    | Qualitative (cross-sectional)                                                | Alcoholic and/or abusive husband, intimate partner violence, raising special needs children, and lack of adequate childcare support (severe depression and suicide attempts)                                                                                                                                                                                                       |
| Travasso et al. 2014/ Health Sciences                                                                         |           |                                                                                                                                                                                                              | N=12 (construction sub-sample)                                                                                    |                                                                              |                                                                                                                                                                                                                                                                                                                                                                                    |
| Journal article                                                                                               |           |                                                                                                                                                                                                              | Age: range (20-35 years); mean = 25 years                                                                         |                                                                              | Concerns about welfare of pre-school kids and absence of spousal support (anxiety)                                                                                                                                                                                                                                                                                                 |
| Examining the interaction between bodily pain and mental health of construction workers                       | Australia | Exploration of the impact of musculoskeletal bodily pain on construction workers’ mental health                                                                                                              | Site-based manual workers in the commercial construction sector                                                   | Mixed methods (cross-sectional)                                              | Pain can lead directly to poor mental health and impact work ability                                                                                                                                                                                                                                                                                                               |
| Turner and Lingard 2020/ Built Environment                                                                    |           |                                                                                                                                                                                                              | N=18 (Qual)/ 67 (Quant)                                                                                           | Theoretical framework: Ilmarinen et al.’s (2005, 2015) model of work ability | Pain can trigger various pressures and stressors for workers which may lead to poor mental health                                                                                                                                                                                                                                                                                  |
| Journal article                                                                                               |           |                                                                                                                                                                                                              | Age: range (20-57 years); mean = 35.9 years; median = 34 years; 25.40%-70.20%                                     |                                                                              | Pressures and stressors present as psychological demands for workers                                                                                                                                                                                                                                                                                                               |
| Relating Age, Decision Authority, Job Satisfaction, and Mental Health: A Study of Construction Workers        | USA       | Examining how age interacts with decision authority, a dimension of job control and a type of autonomy, to affect job satisfaction which in turn affects mental health in construction workers               | Construction workers in the US                                                                                    | Quantitative (cross-sectional)                                               | The indirect effect of decision authority on mental health through job satisfaction is significant at all age levels and increases in a positive way with age, such that it is stronger for older than for younger construction workers                                                                                                                                            |
| Zaniboni et al./2016/Health Sciences                                                                          |           |                                                                                                                                                                                                              | N=528                                                                                                             | Theoretical framework: selective optimization and compensation [SOC] theory  |                                                                                                                                                                                                                                                                                                                                                                                    |
| Journal article                                                                                               |           |                                                                                                                                                                                                              | Age: range (24-77 years); mean = 44.56 years; 35.9% of sample below 40 years; specific discussion on young people |                                                                              |                                                                                                                                                                                                                                                                                                                                                                                    |

**Note:** Studies are arranged by author(s) names in alphabetical order.

\*Percentages represent minimum proportion of young construction workers in a sample.

N= sample size; PRF = psychosocial risk factor; PTSD = post-traumatic stress disorder; MSS: musculoskeletal symptoms; FIFO = fly-in-fly-out; DIDO = drive-in-drive-out; AISRAP = Australian Institute of Suicide Research and Prevention; DAFW = days away from work; Qual = qualitative; Quant = quantitative
